# Supplementary material
Source: PubMed Central journal article supplement (PMC10065474)
Supplement: NIHMS1836664-supplement-Supporting_Information.pdf [file NIHMS1836664-supplement-Supporting_Information.pdf]

**Online Monitoring of Small Volume Reactions**  
**Using Compact Liquid Chromatography Instrumentation**

Samuel W. Foster<sup>1</sup>, Xiaofeng Xie<sup>2,3</sup>, Jacob M. Hellmig<sup>1</sup>, Gustavo Moura-Letts<sup>1</sup>, W. Raymond West<sup>2</sup>,  
Milton L. Lee<sup>2,3</sup>, James P. Grinias<sup>1,\*</sup>

<sup>1</sup>Department of Chemistry & Biochemistry, Rowan University, Glassboro, NJ 08028

<sup>2</sup>Axcend Corporation, Provo, UT 84604

<sup>3</sup>Department of Chemistry and Biochemistry, Brigham Young University, Provo, UT 84602

\*Corresponding Author: James P. Grinias, grinias@rowan.edu

**Supporting Information**

|                        |        |
|------------------------|--------|
| <b>Figure S1</b> ..... | Page 2 |
| <b>Figure S2</b> ..... | Page 3 |
| <b>Figure S3</b> ..... | Page 4 |

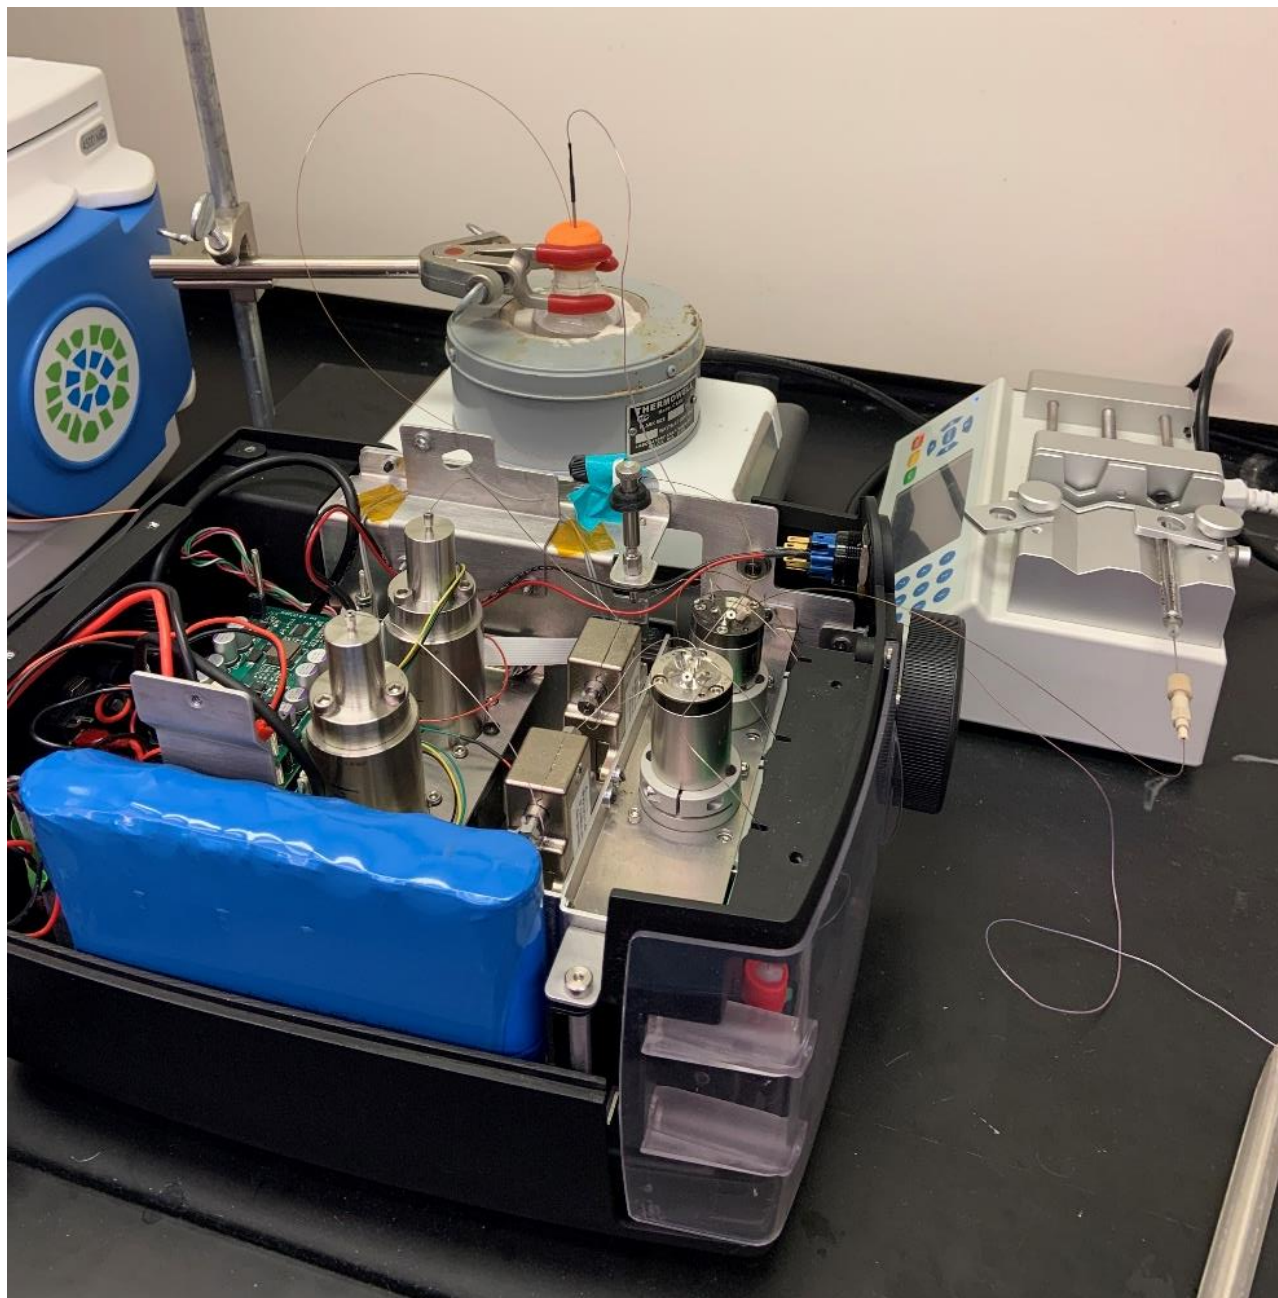

**Figure S1.** Photograph of instrument set-up used for online LC-UV-MS monitoring of an imine formation reaction using compact instrumentation.

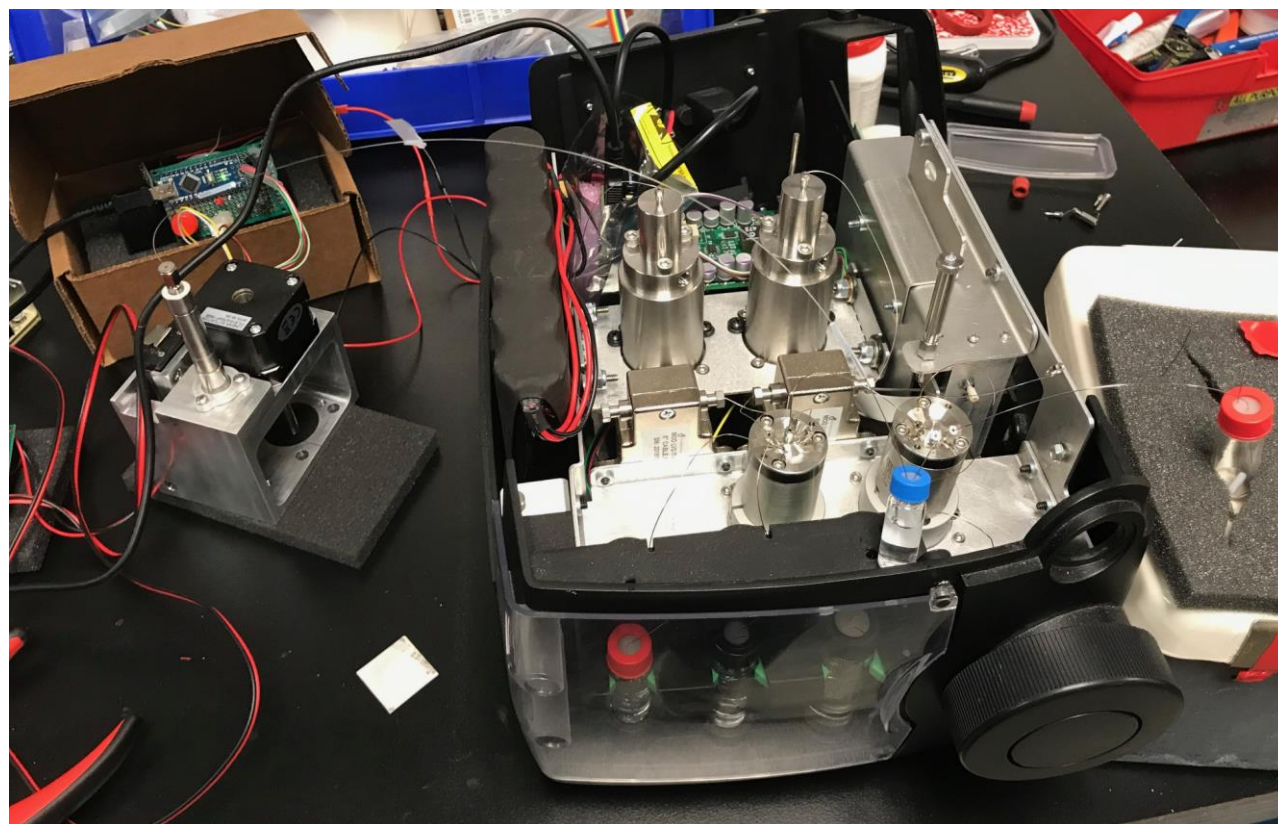

**Figure S2.** Photograph of instrument set-up used for online LC-UV monitoring of an acid hydrolysis reaction using compact instrumentation.

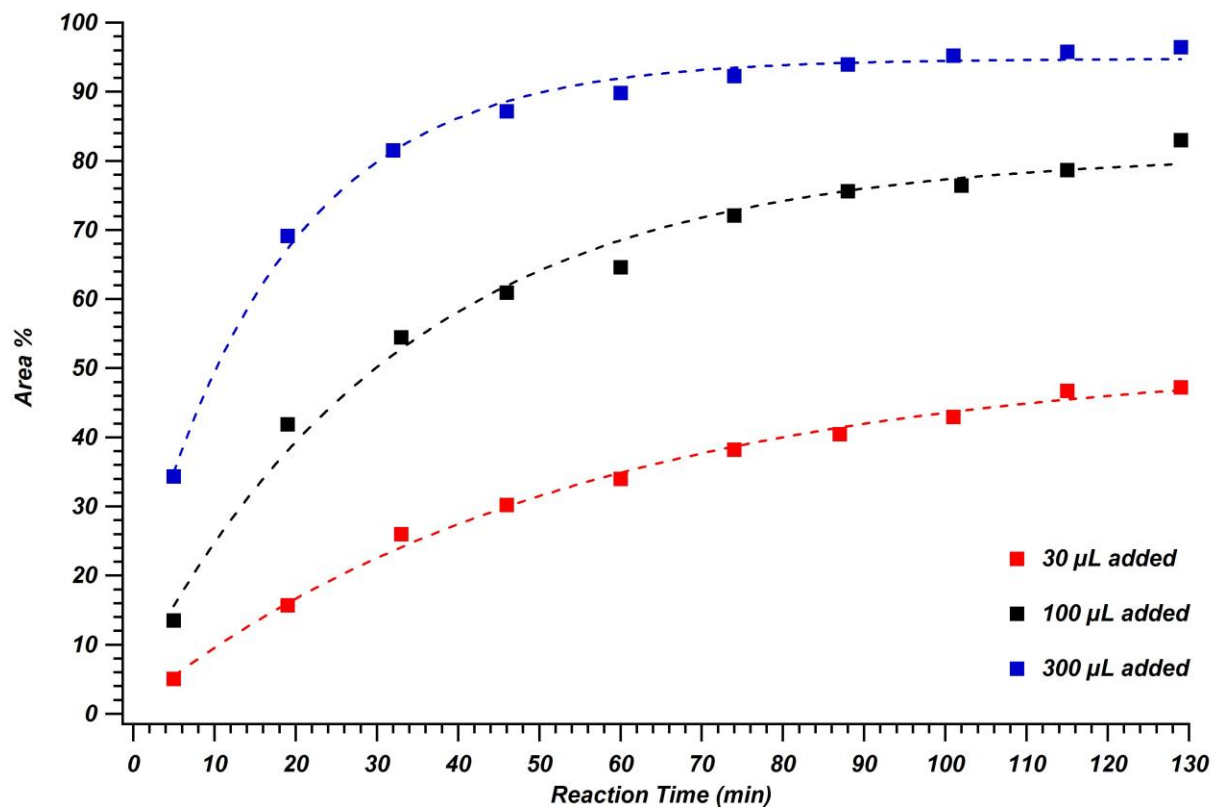

**Figure S3.** Increase in product peak area percentage (as measured by MS detection) for imine formation reaction when 30  $\mu\text{L}$  (red markers), 100  $\mu\text{L}$  (black markers), and 300  $\mu\text{L}$  (blue markers) of isopropylamine were added to the reaction mixture.
